# Supplementary material for: Grape Berry Responses to Sequential Flooding and Heatwave Events: A Physiological, Transcriptional, and Metabolic Overview
Source: Plants (Basel). 2022 Dec 17;11(24):3574. doi: 10.3390/plants11243574 (PMC9788187; doi:10.3390/plants11243574)
Supplement: Supplementary file 1 [file plants-11-03574-s001.zip › Table S1.xlsx]

## Sheet: Table S1
	Table S1. Summary of the RNASeq reads sequenced for each sample and the total no. and percentage of both the mapped reads and those with multiple alignments.
	Sample	Mean values						T0 C			T0 F
	Replicate							T0_C1	T0_C2	T0_C3	T0_F1	T0_F2	T0_F3
	No. of mapped reads	2.16862e+07						19885434	19769224	18394275	19948454	22575445	18853536
	%	0.903348						0.913	0.912	0.908	0.912	0.918	0.908
	No. of read with multiple alignments	615357						555496	556444	507700	563250	641234	529471
	%	0.0284545						0.028	0.028	0.028	0.028	0.028	0.028
	Total No. of reads	2.4014e+07						21777152	21678962	20260005	21870096	24580071	20755810
	Sample	T1 C			T1 F			T1 H			T1 FH
	Replicate	T1_C1	T1_C2	T1_C3	T1_F1	T1_F2	T1_F3	T1_H1	T1_H2	T1_H3	T1_FH1	T1_FH2	T1_FH3
	No. of mapped reads	18556538	18687866	18807170	21023464	19107174	19492592	19182704	18188837	19694361	20272008	20286628	19133847
	%	0.916	0.91	0.893	0.907	0.899	0.897	0.907	0.898	0.912	0.907	0.905	0.899
	No. of read with multiple alignments	568270	520623	527948	552689	488455	514855	594484	557213	562012	530663	581016	534123
	%	0.031	0.028	0.028	0.026	0.026	0.026	0.031	0.031	0.029	0.026	0.029	0.028
	Total No. of reads	20251988	20527980	21059868	23188696	21253093	21739444	21156461	20257204	21586189	22355223	22416081	21281609
	Sample	T2 C			T2 F			T2 H			T2 FH
	Replicate	T2_C1	T2_C2	T2_C3	T2_F1	T2_F2	T2_F3	T2_H1	T2_H2	T2_H3	T2_FH1	T2_FH2	T2_FH3
	No. of mapped reads	19327820	18807187	20179174	20107461	21141440	19214885	19001840	20845969	21497046	20068373	20234307	20527273
	%	0.906	0.904	0.909	0.914	0.912	0.907	0.906	0.903	0.905	0.9	0.904	0.904
	No. of read with multiple alignments	512914	497577	541279	524638	541135	533161	591757	707500	700708	614144	604153	660811
	%	0.027	0.026	0.027	0.026	0.026	0.028	0.031	0.034	0.033	0.031	0.03	0.032
	Total No. of reads	21331360	20793919	22196002	21998428	23179044	21182838	20984593	23089614	23757356	22300623	22383581	22710710
	Sample	T3 C			T3 F			T3 H			T3 FH
	Replicate	T3_C1	T3_C2	T3_C3	T3_F1	T3_F2	T3_F3	T3_H1	T3_H2	T3_H3	T3_FH1	T3_FH2	T3_FH3
	No. of mapped reads	20428585	21354183	19121106	22651547	23042598	23491045	19016587	20685254	18701984	22052407	21533403	23628024
	%	0.914	0.907	0.886	0.905	0.894	0.894	0.903	0.913	0.911	0.908	0.905	0.907
	No. of read with multiple alignments	547564	578631	506911	645210	612205	615596	548671	594964	534609	695451	732226	753254
	%	0.027	0.027	0.027	0.028	0.027	0.026	0.029	0.029	0.029	0.032	0.034	0.032
	Total No. of reads	22361126	23541762	21578460	25023206	25764749	26272611	21062400	22662865	20537939	24282798	23802190	26040637
	Sample	T4 C			T4 F			T4 H			T4 FH
	Replicate	T4_C1	T4_C2	T4_C3	T4_F1	T4_F2	T4_F3	T4_H1	T4_H2	T4_H3	T4_FH1	T4_FH2	T4_FH3
	No. of mapped reads	22524049	26729498	24865016	24268720	23962939	24333369	24619542	23292480	24061936	25126655	23146289	23126533
	%	0.898	0.901	0.901	0.9	0.899	0.886	0.9	0.899	0.9	0.896	0.88	0.906
	No. of read with multiple alignments	619561	723421	699275	651675	653011	696892	700281	653807	675605	712480	871503	654138
	%	0.028	0.027	0.028	0.027	0.027	0.029	0.028	0.028	0.028	0.028	0.038	0.028
	Total No. of reads	25092275	29673816	27584409	26960203	26646172	27469347	27342242	25901194	26741263	28032473	26311445	25534788
	Sample	T5 C			T5 F			T5 H			T5 FH
	Replicate	T5_C1	T5_C2	T5_C3	T5_F1	T5_F2	T5_F3	T5_H1	T5_H2	T5_H3	T5_FH1	T5_FH2	T5_FH3
	No. of mapped reads	27020469	25290211	23752122	23651474	25383493	24876984	24458232	23524516	23627015	24066789	23617553	23447223
	%	0.906	0.91	0.895	0.904	0.907	0.895	0.905	0.893	0.895	0.895	0.908	0.9
	No. of read with multiple alignments	731769	721638	666031	615709	681208	713487	673924	614300	662941	660972	634899	644032
	%	0.027	0.029	0.028	0.026	0.027	0.029	0.028	0.026	0.028	0.027	0.027	0.027
	Total No. of reads	29815368	27786318	26537337	26157631	27988948	27804413	27017189	26334791	26411527	26885789	25996655	26063552
