# Supplementary material for: Grape Berry Responses to Sequential Flooding and Heatwave Events: A Physiological, Transcriptional, and Metabolic Overview
Source: Plants (Basel). 2022 Dec 17;11(24):3574. doi: 10.3390/plants11243574 (PMC9788187; doi:10.3390/plants11243574)
Supplement: Supplementary file 1 [file plants-11-03574-s001.zip › Table S2.xlsx]

## Sheet: Foglio1
Table S2. List of Differentially Expressed Genes (DEGs) in all the analyzed contrasts, using both a false discovery rate (FDR) threshold equal to 0.05 and a fold-change (FC) threshold of 1.5.
Contrast	Regulation	Gene Ids >>>>>>>>
T0_C-T0_F	UP	VIT_202S0025G04600
	DOWN	VIT_204S0023G00230	VIT_205S0049G00520	VIT_205S0051G00590	VIT_205S0077G01980	VIT_206S0061G00550	VIT_213S0067G02930	VIT_214S0108G00450	VIT_217S0000G00430	VIT_217S0000G03930	VIT_218S0001G06060	VIT_218S0001G11930
T1_C-T1_F	UP	VIT_200S0125G00180	VIT_200S0160G00120	VIT_200S0174G00140	VIT_200S0174G00170	VIT_200S0174G00330	VIT_200S0179G00110	VIT_200S0179G00220	VIT_200S0179G00360	VIT_200S0181G00220	VIT_200S0187G00320	VIT_200S0194G00080	VIT_200S0194G00200	VIT_200S0194G00260	VIT_200S0194G00270	VIT_200S0194G00300	VIT_200S0194G00330	VIT_200S0199G00190	VIT_200S0199G00220	VIT_200S0199G00240	VIT_200S0203G00160	VIT_200S0207G00040	VIT_200S0207G00110	VIT_200S0207G00150	VIT_200S0211G00010	VIT_200S0211G00080	VIT_200S0211G00120	VIT_200S0214G00020	VIT_200S0225G00070	VIT_200S0225G00080	VIT_200S0225G00120	VIT_200S0226G00060	VIT_200S0227G00090	VIT_200S0229G00050	VIT_200S0229G00100	VIT_200S0229G00180	VIT_200S0233G00010	VIT_200S0238G00020	VIT_200S0250G00080	VIT_200S0253G00140	VIT_200S0258G00050	VIT_200S0259G00120	VIT_200S0264G00100	VIT_200S0271G00080	VIT_200S0274G00050	VIT_200S0276G00050	VIT_200S0286G00140	VIT_200S0304G00020	VIT_200S0313G00020
	DOWN	VIT_200S0125G00230	VIT_200S0125G00250	VIT_200S0144G00220	VIT_200S0144G00270	VIT_200S0179G00370	VIT_200S0181G00250	VIT_200S0184G00020	VIT_200S0187G00170	VIT_200S0187G00270	VIT_200S0189G00080	VIT_200S0194G00110	VIT_200S0203G00050	VIT_200S0203G00180	VIT_200S0207G00280	VIT_200S0211G00050	VIT_200S0214G00060	VIT_200S0214G00090	VIT_200S0215G00030	VIT_200S0216G00060	VIT_200S0216G00070	VIT_200S0218G00210	VIT_200S0220G00070	VIT_200S0225G00090	VIT_200S0225G00230	VIT_200S0226G00040	VIT_200S0226G00090	VIT_200S0227G00170	VIT_200S0231G00070	VIT_200S0233G00060	VIT_200S0233G00180	VIT_200S0245G00060	VIT_200S0245G00070	VIT_200S0259G00110	VIT_200S0269G00030	VIT_200S0271G00110	VIT_200S0274G00080	VIT_200S0274G00090	VIT_200S0282G00040	VIT_200S0287G00050	VIT_200S0304G00010	VIT_200S0322G00010	VIT_200S0322G00030	VIT_200S0323G00070	VIT_200S0324G00050	VIT_200S0324G00070	VIT_200S0337G00010	VIT_200S0340G00050	VIT_200S0340G00060
T1_C-T1_FH	UP	VIT_200S0211G00010	VIT_200S0229G00050	VIT_200S0286G00140	VIT_200S0304G00020	VIT_200S0375G00030	VIT_200S0397G00010	VIT_200S0400G00020	VIT_200S0471G00010	VIT_200S0480G00070	VIT_200S0525G00040	VIT_200S0753G00010	VIT_200S1682G00020	VIT_201S0011G02000	VIT_201S0011G02030	VIT_201S0011G04060	VIT_201S0011G04080	VIT_201S0011G04700	VIT_201S0011G04720	VIT_201S0011G04740	VIT_201S0011G06240	VIT_201S0011G06330	VIT_201S0026G00350	VIT_201S0026G01640	VIT_201S0026G02340	VIT_201S0127G00010	VIT_201S0127G00560	VIT_201S0127G00740	VIT_201S0137G00710	VIT_202S0012G00450	VIT_202S0025G03450	VIT_202S0025G03700	VIT_202S0033G01210	VIT_202S0087G00170	VIT_202S0154G00240	VIT_202S0154G00250	VIT_202S0241G00050	VIT_203S0017G00650	VIT_203S0038G02520	VIT_203S0038G04250	VIT_203S0180G00090	VIT_203S0180G00210	VIT_204S0008G01160	VIT_204S0008G01880	VIT_204S0008G04050	VIT_204S0008G04310	VIT_204S0023G00360	VIT_204S0023G03710	VIT_204S0044G01510
	DOWN	VIT_200S0179G00370	VIT_200S0187G00110	VIT_200S0187G00130	VIT_200S0203G00180	VIT_200S0214G00090	VIT_200S0216G00060	VIT_200S0220G00070	VIT_200S0225G00090	VIT_200S0225G00230	VIT_200S0259G00110	VIT_200S0271G00110	VIT_200S0274G00080	VIT_200S0304G00010	VIT_200S0322G00010	VIT_200S0322G00030	VIT_200S0324G00070	VIT_200S0340G00050	VIT_200S0340G00060	VIT_200S0346G00110	VIT_200S0374G00050	VIT_200S0407G00020	VIT_200S0524G00030	VIT_200S2188G00010	VIT_200S2349G00010	VIT_200S2364G00010	VIT_200S2377G00010	VIT_200S2526G00010	VIT_200S2620G00010	VIT_201S0010G00240	VIT_201S0010G01430	VIT_201S0010G01680	VIT_201S0010G02030	VIT_201S0010G02260	VIT_201S0010G02460	VIT_201S0011G00410	VIT_201S0011G00820	VIT_201S0011G02300	VIT_201S0011G02310	VIT_201S0011G02360	VIT_201S0011G03660	VIT_201S0011G03670	VIT_201S0011G04200	VIT_201S0011G04240	VIT_201S0011G04250	VIT_201S0011G04620	VIT_201S0011G05590	VIT_201S0011G06250	VIT_201S0011G06460
T1_C-T1_H	UP	VIT_200S0218G00090	VIT_200S0265G00060	VIT_200S0286G00140	VIT_200S0370G00020	VIT_200S0397G00010	VIT_200S0400G00020	VIT_200S0455G00040	VIT_200S0475G00010	VIT_200S0992G00010	VIT_201S0011G00780	VIT_201S0011G04080	VIT_201S0026G00200	VIT_201S0026G02340	VIT_202S0012G00140	VIT_202S0025G04520	VIT_202S0087G00170	VIT_202S0087G00460	VIT_202S0154G00080	VIT_203S0038G02650	VIT_203S0038G04250	VIT_203S0063G00840	VIT_203S0180G00090	VIT_204S0008G04350	VIT_204S0008G06500	VIT_204S0023G02690	VIT_205S0020G00440	VIT_205S0020G01530	VIT_205S0029G00390	VIT_205S0049G00480	VIT_205S0049G01180	VIT_205S0077G00620	VIT_205S0077G01650	VIT_205S0094G00480	VIT_205S0094G01630	VIT_205S0124G00560	VIT_206S0004G00980	VIT_206S0004G05910	VIT_206S0004G08210	VIT_206S0009G00690	VIT_207S0005G03630	VIT_207S0031G01470	VIT_207S0031G01700	VIT_207S0129G00210	VIT_207S0129G00220	VIT_207S0197G00250	VIT_207S0205G00010	VIT_208S0007G05750	VIT_208S0040G00010
	DOWN	VIT_200S0361G00080	VIT_201S0011G02050	VIT_202S0025G01710	VIT_202S0025G02560	VIT_203S0017G00540	VIT_203S0017G02160	VIT_203S0038G01380	VIT_203S0038G02110	VIT_203S0063G02520	VIT_203S0091G00860	VIT_204S0008G02050	VIT_204S0023G01710	VIT_205S0020G00170	VIT_205S0020G00830	VIT_205S0020G02770	VIT_205S0020G03070	VIT_205S0020G04110	VIT_205S0051G00680	VIT_205S0077G01150	VIT_206S0004G05460	VIT_206S0061G00080	VIT_207S0031G01640	VIT_207S0141G00620	VIT_208S0007G07620	VIT_208S0040G01720	VIT_208S0040G02950	VIT_208S0058G00900	VIT_209S0002G01470	VIT_209S0002G06790	VIT_209S0002G08540	VIT_209S0018G00620	VIT_209S0054G00610	VIT_211S0016G03170	VIT_211S0016G03180	VIT_211S0118G00480	VIT_212S0035G01050	VIT_213S0067G02560	VIT_213S0101G00460	VIT_214S0006G00660	VIT_214S0006G01530	VIT_214S0006G01580	VIT_214S0083G00170	VIT_214S0108G01350	VIT_214S0171G00360	VIT_216S0022G00480	VIT_216S0050G00390	VIT_216S0050G01090	VIT_217S0000G00140
T1_FH-T1_F	UP	VIT_200S1430G00010	VIT_201S0026G01780	VIT_202S0012G02160	VIT_202S0025G05110	VIT_204S0008G02270	VIT_204S0023G03010	VIT_205S0094G00020	VIT_207S0031G00780	VIT_208S0007G08540	VIT_208S0058G00910	VIT_209S0054G01750	VIT_211S0016G00590	VIT_211S0016G01880	VIT_211S0016G02010	VIT_211S0016G02790	VIT_211S0016G03370	VIT_211S0149G00040	VIT_212S0035G00030	VIT_212S0057G00390	VIT_214S0006G01970	VIT_214S0083G00120	VIT_214S0108G01420	VIT_215S0046G00980	VIT_215S0046G02130	VIT_216S0039G00570	VIT_217S0000G04860	VIT_218S0001G00170	VIT_218S0001G09910
	DOWN	VIT_200S0187G00270	VIT_200S0225G00230	VIT_201S0113G00530	VIT_203S0063G00840	VIT_204S0008G06500	VIT_205S0077G00610	VIT_207S0151G00140	VIT_208S0007G00090	VIT_208S0007G06530	VIT_211S0016G05060	VIT_211S0016G05070	VIT_214S0060G01170	VIT_214S0081G00540	VIT_214S0083G00710	VIT_215S0024G00070	VIT_216S0115G00180	VIT_218S0001G13610	VIT_218S0072G00950	VIT_219S0015G02690
T1_H-T1_F	UP	VIT_200S0125G00180	VIT_200S0125G00280	VIT_200S0125G00290	VIT_200S0173G00060	VIT_200S0174G00170	VIT_200S0174G00330	VIT_200S0179G00110	VIT_200S0179G00220	VIT_200S0179G00360	VIT_200S0181G00070	VIT_200S0181G00220	VIT_200S0184G00180	VIT_200S0187G00040	VIT_200S0187G00320	VIT_200S0194G00020	VIT_200S0194G00080	VIT_200S0194G00140	VIT_200S0194G00160	VIT_200S0194G00190	VIT_200S0194G00200	VIT_200S0194G00270	VIT_200S0194G00300	VIT_200S0194G00330	VIT_200S0199G00190	VIT_200S0199G00240	VIT_200S0207G00110	VIT_200S0207G00210	VIT_200S0207G00250	VIT_200S0207G00270	VIT_200S0211G00010	VIT_200S0211G00120	VIT_200S0211G00160	VIT_200S0214G00010	VIT_200S0214G00020	VIT_200S0218G00070	VIT_200S0218G00190	VIT_200S0220G00110	VIT_200S0225G00080	VIT_200S0225G00120	VIT_200S0226G00060	VIT_200S0227G00090	VIT_200S0227G00190	VIT_200S0229G00020	VIT_200S0229G00180	VIT_200S0233G00010	VIT_200S0238G00020	VIT_200S0250G00080	VIT_200S0253G00140
	DOWN	VIT_200S0125G00090	VIT_200S0125G00230	VIT_200S0125G00250	VIT_200S0125G00350	VIT_200S0144G00270	VIT_200S0163G00060	VIT_200S0179G00260	VIT_200S0179G00350	VIT_200S0179G00370	VIT_200S0181G00080	VIT_200S0181G00120	VIT_200S0186G00090	VIT_200S0187G00270	VIT_200S0189G00080	VIT_200S0194G00180	VIT_200S0198G00150	VIT_200S0199G00020	VIT_200S0199G00030	VIT_200S0201G00060	VIT_200S0203G00020	VIT_200S0207G00280	VIT_200S0214G00090	VIT_200S0215G00030	VIT_200S0216G00020	VIT_200S0216G00070	VIT_200S0218G00090	VIT_200S0218G00210	VIT_200S0220G00070	VIT_200S0225G00090	VIT_200S0225G00220	VIT_200S0225G00230	VIT_200S0226G00040	VIT_200S0226G00090	VIT_200S0231G00070	VIT_200S0233G00030	VIT_200S0233G00060	VIT_200S0233G00180	VIT_200S0245G00060	VIT_200S0245G00070	VIT_200S0250G00030	VIT_200S0253G00040	VIT_200S0259G00110	VIT_200S0260G00060	VIT_200S0264G00020	VIT_200S0265G00060	VIT_200S0271G00110	VIT_200S0274G00080	VIT_200S0274G00090
T1_H-T1_FH	UP	VIT_200S0194G00270	VIT_200S0211G00010	VIT_200S0218G00070	VIT_200S0333G00020	VIT_200S0532G00030	VIT_200S0684G00030	VIT_200S0978G00020	VIT_200S1232G00030	VIT_200S2300G00010	VIT_201S0010G00590	VIT_201S0010G00740	VIT_201S0010G00920	VIT_201S0011G00630	VIT_201S0011G00880	VIT_201S0011G02860	VIT_201S0011G04670	VIT_201S0026G01100	VIT_201S0026G02740	VIT_201S0127G00740	VIT_201S0150G00200	VIT_202S0012G00450	VIT_202S0012G01090	VIT_202S0012G01120	VIT_202S0025G01470	VIT_203S0017G02290	VIT_203S0038G00270	VIT_203S0038G00320	VIT_203S0038G00670	VIT_203S0038G01330	VIT_203S0038G02610	VIT_203S0038G03060	VIT_203S0038G03180	VIT_203S0038G04180	VIT_203S0063G02040	VIT_203S0088G00990	VIT_203S0088G01190	VIT_204S0008G01320	VIT_204S0008G03030	VIT_204S0008G04310	VIT_204S0023G00880	VIT_204S0023G01140	VIT_204S0023G03010	VIT_204S0023G03290	VIT_204S0043G00380	VIT_204S0044G01310	VIT_205S0020G02930	VIT_205S0077G02260	VIT_206S0004G01110
	DOWN	VIT_200S0179G00370	VIT_200S0218G00090	VIT_200S0225G00090	VIT_200S0225G00230	VIT_200S0231G00070	VIT_200S0253G00040	VIT_200S0271G00110	VIT_200S0274G00080	VIT_200S0274G00090	VIT_200S0304G00010	VIT_200S0322G00030	VIT_200S0323G00070	VIT_200S0340G00050	VIT_200S0340G00060	VIT_200S0346G00110	VIT_200S0357G00100	VIT_200S0370G00020	VIT_200S0434G00090	VIT_200S0580G00010	VIT_200S0615G00010	VIT_200S0771G00020	VIT_200S1364G00010	VIT_200S2526G00010	VIT_201S0010G02460	VIT_201S0010G03750	VIT_201S0011G03670	VIT_201S0011G04200	VIT_201S0011G04770	VIT_201S0011G04850	VIT_201S0011G06270	VIT_201S0026G02620	VIT_201S0127G00360	VIT_201S0127G00470	VIT_201S0127G00680	VIT_201S0137G00340	VIT_201S0150G00160	VIT_201S0150G00410	VIT_201S0150G00430	VIT_202S0012G00500	VIT_202S0012G01040	VIT_202S0012G02220	VIT_202S0012G02670	VIT_202S0025G00780	VIT_202S0025G01320	VIT_202S0025G01450	VIT_202S0025G02420	VIT_202S0025G03730	VIT_202S0025G04280
T2_C-T2_F	UP	VIT_202S0025G04600
	DOWN
T2_C-T2_FH	UP	VIT_200S0174G00170	VIT_200S0194G00080	VIT_200S0203G00130	VIT_200S0204G00030	VIT_200S0207G00010	VIT_200S0218G00220	VIT_200S0229G00050	VIT_200S0267G00030	VIT_200S0301G00060	VIT_200S0333G00060	VIT_200S0341G00010	VIT_200S0357G00130	VIT_200S0374G00050	VIT_200S0375G00030	VIT_200S0375G00040	VIT_200S0394G00010	VIT_200S0404G00080	VIT_200S0415G00060	VIT_200S0429G00040	VIT_200S0475G00020	VIT_200S0499G00020	VIT_200S0499G00030	VIT_200S0525G00050	VIT_200S0527G00030	VIT_200S0532G00050	VIT_200S0601G00040	VIT_200S0657G00010	VIT_200S0674G00010	VIT_200S0800G00020	VIT_200S0802G00010	VIT_200S0921G00020	VIT_200S0941G00020	VIT_200S1003G00010	VIT_200S1206G00010	VIT_200S1328G00020	VIT_200S1349G00010	VIT_200S1353G00010	VIT_200S2015G00020	VIT_200S2086G00010	VIT_200S2125G00010	VIT_200S2269G00010	VIT_200S2507G00010	VIT_200S2594G00010	VIT_201S0010G01200	VIT_201S0010G01850	VIT_201S0010G02210	VIT_201S0011G00060	VIT_201S0011G00530
	DOWN	VIT_200S0120G00010	VIT_200S0120G00270	VIT_200S0125G00090	VIT_200S0125G00230	VIT_200S0174G00300	VIT_200S0174G00320	VIT_200S0194G00180	VIT_200S0204G00020	VIT_200S0218G00120	VIT_200S0233G00030	VIT_200S0245G00070	VIT_200S0265G00090	VIT_200S0270G00030	VIT_200S0270G00120	VIT_200S0285G00030	VIT_200S0291G00070	VIT_200S0301G00100	VIT_200S0322G00020	VIT_200S0347G00070	VIT_200S0391G00070	VIT_200S0415G00080	VIT_200S0437G00010	VIT_200S0471G00010	VIT_200S0477G00040	VIT_200S0670G00020	VIT_200S0743G00030	VIT_200S0801G00010	VIT_200S1045G00030	VIT_200S1665G00010	VIT_201S0010G02160	VIT_201S0010G03750	VIT_201S0010G03930	VIT_201S0010G03940	VIT_201S0011G01110	VIT_201S0011G01470	VIT_201S0011G01940	VIT_201S0011G02320	VIT_201S0011G02950	VIT_201S0011G04670	VIT_201S0011G04870	VIT_201S0011G05150	VIT_201S0011G05960	VIT_201S0026G00280	VIT_201S0026G01660	VIT_201S0026G02720	VIT_201S0127G00410	VIT_201S0137G00790	VIT_201S0150G00640
T2_C-T2_H	UP	VIT_200S0131G00010	VIT_200S0160G00090	VIT_200S0160G00310	VIT_200S0174G00330	VIT_200S0179G00320	VIT_200S0184G00050	VIT_200S0187G00340	VIT_200S0194G00080	VIT_200S0194G00330	VIT_200S0198G00140	VIT_200S0199G00080	VIT_200S0199G00100	VIT_200S0199G00190	VIT_200S0203G00140	VIT_200S0203G00150	VIT_200S0207G00010	VIT_200S0207G00230	VIT_200S0216G00020	VIT_200S0216G00070	VIT_200S0218G00220	VIT_200S0220G00180	VIT_200S0225G00070	VIT_200S0227G00200	VIT_200S0229G00050	VIT_200S0229G00100	VIT_200S0229G00140	VIT_200S0229G00160	VIT_200S0246G00080	VIT_200S0246G00210	VIT_200S0252G00110	VIT_200S0259G00110	VIT_200S0267G00030	VIT_200S0299G00100	VIT_200S0301G00060	VIT_200S0301G00110	VIT_200S0304G00010	VIT_200S0304G00030	VIT_200S0313G00030	VIT_200S0313G00070	VIT_200S0333G00060	VIT_200S0340G00040	VIT_200S0357G00130	VIT_200S0373G00010	VIT_200S0375G00030	VIT_200S0375G00040	VIT_200S0397G00010	VIT_200S0429G00040	VIT_200S0434G00080
	DOWN	VIT_200S0120G00010	VIT_200S0120G00270	VIT_200S0125G00090	VIT_200S0125G00230	VIT_200S0174G00140	VIT_200S0174G00300	VIT_200S0174G00320	VIT_200S0179G00260	VIT_200S0181G00080	VIT_200S0187G00090	VIT_200S0194G00180	VIT_200S0203G00050	VIT_200S0203G00060	VIT_200S0204G00020	VIT_200S0207G00020	VIT_200S0207G00190	VIT_200S0214G00150	VIT_200S0218G00120	VIT_200S0225G00010	VIT_200S0225G00120	VIT_200S0227G00170	VIT_200S0246G00240	VIT_200S0252G00130	VIT_200S0265G00090	VIT_200S0270G00120	VIT_200S0282G00020	VIT_200S0285G00030	VIT_200S0291G00050	VIT_200S0291G00070	VIT_200S0291G00080	VIT_200S0294G00040	VIT_200S0301G00100	VIT_200S0302G00060	VIT_200S0324G00040	VIT_200S0337G00080	VIT_200S0341G00040	VIT_200S0347G00060	VIT_200S0347G00070	VIT_200S0361G00080	VIT_200S0391G00050	VIT_200S0391G00070	VIT_200S0410G00030	VIT_200S0415G00080	VIT_200S0434G00060	VIT_200S0437G00010	VIT_200S0438G00020	VIT_200S0454G00010	VIT_200S0463G00020
T2_FH-T2_F	UP	VIT_200S0125G00230	VIT_200S0174G00320	VIT_200S0194G00180	VIT_200S0199G00260	VIT_200S0204G00020	VIT_200S0265G00090	VIT_200S0282G00020	VIT_200S0285G00030	VIT_200S0291G00070	VIT_200S0301G00100	VIT_200S0316G00010	VIT_200S0333G00040	VIT_200S0347G00070	VIT_200S0369G00050	VIT_200S0415G00080	VIT_200S0437G00010	VIT_200S0593G00010	VIT_200S0670G00020	VIT_200S0743G00030	VIT_200S1045G00030	VIT_200S1542G00010	VIT_200S1665G00010	VIT_200S1897G00010	VIT_200S2197G00010	VIT_201S0010G01030	VIT_201S0010G02160	VIT_201S0010G03750	VIT_201S0010G03930	VIT_201S0011G01150	VIT_201S0011G01470	VIT_201S0011G02320	VIT_201S0011G02530	VIT_201S0011G03730	VIT_201S0011G05960	VIT_201S0026G01630	VIT_201S0026G01660	VIT_201S0137G00790	VIT_201S0150G00200	VIT_201S0150G00640	VIT_201S0244G00170	VIT_202S0012G00290	VIT_202S0012G01630	VIT_202S0025G00350	VIT_202S0025G00700	VIT_202S0025G00830	VIT_202S0025G01040	VIT_202S0025G01140	VIT_202S0025G03310
	DOWN	VIT_200S0160G00310	VIT_200S0203G00130	VIT_200S0207G00010	VIT_200S0220G00180	VIT_200S0225G00230	VIT_200S0267G00030	VIT_200S0301G00060	VIT_200S0357G00130	VIT_200S0374G00050	VIT_200S0375G00040	VIT_200S0394G00040	VIT_200S0429G00040	VIT_200S0434G00080	VIT_200S0525G00050	VIT_200S0532G00050	VIT_200S0601G00040	VIT_200S0674G00010	VIT_200S0941G00020	VIT_200S1206G00010	VIT_200S2086G00010	VIT_200S2269G00010	VIT_200S2507G00010	VIT_201S0010G01850	VIT_201S0010G02210	VIT_201S0011G00530	VIT_201S0011G00600	VIT_201S0011G00840	VIT_201S0011G01280	VIT_201S0011G01660	VIT_201S0011G01780	VIT_201S0011G02000	VIT_201S0011G03010	VIT_201S0011G03180	VIT_201S0011G04450	VIT_201S0011G04950	VIT_201S0011G05240	VIT_201S0011G05250	VIT_201S0011G05790	VIT_201S0011G05880	VIT_201S0011G06010	VIT_201S0011G06460	VIT_201S0026G00320	VIT_201S0026G00810	VIT_201S0026G00840	VIT_201S0026G01250	VIT_201S0026G02550	VIT_201S0127G00070	VIT_201S0137G00200
T2_H-T2_F	UP	VIT_200S0120G00010	VIT_200S0125G00090	VIT_200S0125G00230	VIT_200S0174G00300	VIT_200S0174G00320	VIT_200S0179G00250	VIT_200S0179G00260	VIT_200S0181G00080	VIT_200S0187G00090	VIT_200S0189G00050	VIT_200S0194G00180	VIT_200S0194G00260	VIT_200S0204G00020	VIT_200S0207G00020	VIT_200S0207G00190	VIT_200S0207G00200	VIT_200S0214G00150	VIT_200S0225G00010	VIT_200S0225G00120	VIT_200S0226G00110	VIT_200S0227G00170	VIT_200S0252G00130	VIT_200S0265G00090	VIT_200S0282G00020	VIT_200S0283G00030	VIT_200S0285G00030	VIT_200S0291G00050	VIT_200S0291G00070	VIT_200S0291G00080	VIT_200S0294G00040	VIT_200S0299G00080	VIT_200S0301G00040	VIT_200S0301G00100	VIT_200S0323G00020	VIT_200S0323G00030	VIT_200S0323G00050	VIT_200S0324G00040	VIT_200S0332G00110	VIT_200S0333G00040	VIT_200S0337G00080	VIT_200S0341G00040	VIT_200S0347G00070	VIT_200S0361G00080	VIT_200S0369G00050	VIT_200S0434G00060	VIT_200S0437G00010	VIT_200S0454G00010	VIT_200S0463G00020
	DOWN	VIT_200S0125G00170	VIT_200S0160G00090	VIT_200S0160G00110	VIT_200S0160G00310	VIT_200S0160G00320	VIT_200S0174G00330	VIT_200S0179G00320	VIT_200S0184G00050	VIT_200S0187G00300	VIT_200S0187G00340	VIT_200S0194G00080	VIT_200S0198G00170	VIT_200S0199G00080	VIT_200S0199G00090	VIT_200S0199G00100	VIT_200S0203G00140	VIT_200S0203G00150	VIT_200S0207G00010	VIT_200S0207G00230	VIT_200S0216G00020	VIT_200S0216G00070	VIT_200S0218G00110	VIT_200S0220G00070	VIT_200S0220G00180	VIT_200S0226G00170	VIT_200S0227G00200	VIT_200S0229G00140	VIT_200S0229G00160	VIT_200S0231G00070	VIT_200S0246G00080	VIT_200S0246G00210	VIT_200S0253G00040	VIT_200S0259G00110	VIT_200S0267G00030	VIT_200S0274G00090	VIT_200S0301G00060	VIT_200S0301G00090	VIT_200S0301G00110	VIT_200S0304G00010	VIT_200S0313G00030	VIT_200S0313G00070	VIT_200S0333G00060	VIT_200S0335G00010	VIT_200S0340G00040	VIT_200S0341G00060	VIT_200S0357G00130	VIT_200S0361G00040	VIT_200S0373G00010
T2_H-T2_FH	UP
	DOWN	VIT_202S0025G04600	VIT_207S0104G00600	VIT_210S0003G02120
T3_C-T3_F	UP	VIT_208S0007G08460
	DOWN
T3_C-T3_FH	UP	VIT_200S0160G00110	VIT_200S0160G00310	VIT_200S0160G00320	VIT_200S0160G00360	VIT_200S0194G00080	VIT_200S0194G00250	VIT_200S0199G00190	VIT_200S0203G00130	VIT_200S0204G00040	VIT_200S0207G00010	VIT_200S0220G00180	VIT_200S0225G00070	VIT_200S0227G00200	VIT_200S0253G00060	VIT_200S0264G00100	VIT_200S0270G00130	VIT_200S0276G00060	VIT_200S0313G00030	VIT_200S0324G00010	VIT_200S0333G00060	VIT_200S0335G00020	VIT_200S0340G00040	VIT_200S0357G00130	VIT_200S0397G00010	VIT_200S0601G00040	VIT_200S0850G00010	VIT_200S0897G00010	VIT_200S1306G00010	VIT_200S1306G00020	VIT_200S1312G00010	VIT_200S1353G00010	VIT_200S1365G00010	VIT_200S1403G00010	VIT_200S2038G00010	VIT_200S2086G00010	VIT_200S2594G00010	VIT_201S0010G00510	VIT_201S0010G01000	VIT_201S0010G01200	VIT_201S0010G01390	VIT_201S0010G01830	VIT_201S0010G01850	VIT_201S0010G02210	VIT_201S0010G02860	VIT_201S0010G03530	VIT_201S0010G03710	VIT_201S0010G03850	VIT_201S0011G00500
	DOWN	VIT_200S0125G00090	VIT_200S0125G00230	VIT_200S0179G00370	VIT_200S0187G00040	VIT_200S0194G00180	VIT_200S0204G00020	VIT_200S0214G00090	VIT_200S0225G00010	VIT_200S0233G00030	VIT_200S0265G00090	VIT_200S0265G00170	VIT_200S0270G00120	VIT_200S0287G00080	VIT_200S0291G00070	VIT_200S0301G00100	VIT_200S0304G00060	VIT_200S0333G00040	VIT_200S0407G00020	VIT_200S0477G00040	VIT_200S0532G00030	VIT_200S0670G00020	VIT_200S0992G00020	VIT_200S1291G00020	VIT_200S1542G00010	VIT_200S1542G00020	VIT_200S1665G00010	VIT_200S2349G00010	VIT_201S0010G02580	VIT_201S0010G03680	VIT_201S0010G03750	VIT_201S0010G03880	VIT_201S0010G03930	VIT_201S0010G03940	VIT_201S0011G00760	VIT_201S0011G01420	VIT_201S0011G01670	VIT_201S0011G02320	VIT_201S0011G02880	VIT_201S0011G03420	VIT_201S0011G03540	VIT_201S0011G03730	VIT_201S0011G04220	VIT_201S0011G04230	VIT_201S0011G04260	VIT_201S0011G04680	VIT_201S0011G04810	VIT_201S0011G04830	VIT_201S0011G04840
T3_C-T3_H	UP	VIT_200S0207G00010	VIT_200S0225G00230	VIT_200S0394G00040	VIT_200S0471G00030	VIT_200S0601G00040	VIT_201S0010G00980	VIT_201S0010G00990	VIT_201S0011G05880	VIT_201S0026G01250	VIT_201S0127G00010	VIT_201S0127G00230	VIT_201S0137G00400	VIT_201S0150G00060	VIT_201S0150G00140	VIT_201S0150G00380	VIT_202S0012G00280	VIT_202S0025G01610	VIT_202S0025G01990	VIT_202S0033G00700	VIT_202S0087G00370	VIT_202S0154G00200	VIT_203S0017G01380	VIT_203S0038G03950	VIT_203S0088G00650	VIT_203S0091G00230	VIT_204S0008G04950	VIT_204S0023G01000	VIT_204S0023G01610	VIT_204S0023G02130	VIT_204S0079G00230	VIT_205S0062G00780	VIT_205S0077G01650	VIT_205S0077G01670	VIT_206S0009G00310	VIT_206S0009G01090	VIT_207S0005G01520	VIT_207S0005G02210	VIT_207S0005G04190	VIT_207S0104G00470	VIT_207S0104G00640	VIT_207S0104G01280	VIT_208S0007G01290	VIT_208S0007G01490	VIT_208S0040G03280	VIT_208S0105G00590	VIT_209S0002G06010	VIT_210S0003G00420	VIT_210S0003G03080
	DOWN	VIT_200S0265G00080	VIT_200S0265G00090	VIT_200S0304G00070	VIT_200S0323G00100	VIT_200S0407G00020	VIT_200S0705G00010	VIT_200S1290G00010	VIT_200S1372G00020	VIT_200S1566G00010	VIT_200S2249G00010	VIT_200S2349G00010	VIT_201S0010G02580	VIT_201S0011G02530	VIT_201S0011G03420	VIT_201S0011G04810	VIT_201S0011G04840	VIT_201S0011G05650	VIT_201S0026G00220	VIT_201S0026G01400	VIT_201S0137G00630	VIT_202S0012G00290	VIT_202S0025G02560	VIT_202S0025G03000	VIT_202S0033G00270	VIT_202S0087G01010	VIT_203S0017G00710	VIT_203S0017G00830	VIT_203S0038G00760	VIT_203S0038G03040	VIT_203S0038G03400	VIT_203S0063G00120	VIT_203S0091G00690	VIT_204S0008G00870	VIT_204S0008G01040	VIT_204S0008G03770	VIT_204S0008G06250	VIT_204S0044G00040	VIT_204S0069G01010	VIT_205S0020G01820	VIT_205S0020G02280	VIT_205S0020G02770	VIT_205S0020G04820	VIT_205S0049G00550	VIT_205S0051G00670	VIT_205S0062G00480	VIT_205S0077G00430	VIT_205S0077G01150	VIT_205S0102G00210
T3_FH-T3_F	UP	VIT_200S0125G00090	VIT_200S0174G00140	VIT_200S0179G00370	VIT_200S0187G00040	VIT_200S0194G00180	VIT_200S0204G00020	VIT_200S0211G00010	VIT_200S0214G00090	VIT_200S0218G00190	VIT_200S0225G00010	VIT_200S0265G00090	VIT_200S0282G00010	VIT_200S0301G00100	VIT_200S0304G00060	VIT_200S0333G00040	VIT_200S0341G00040	VIT_200S0532G00030	VIT_200S0670G00020	VIT_200S0823G00020	VIT_200S1286G00020	VIT_200S1542G00010	VIT_200S1542G00020	VIT_200S1665G00010	VIT_200S2466G00010	VIT_201S0010G00590	VIT_201S0010G01220	VIT_201S0010G02430	VIT_201S0010G02580	VIT_201S0010G03770	VIT_201S0010G03940	VIT_201S0011G00760	VIT_201S0011G01420	VIT_201S0011G02070	VIT_201S0011G02880	VIT_201S0011G03520	VIT_201S0011G03730	VIT_201S0011G04630	VIT_201S0011G04830	VIT_201S0011G05000	VIT_201S0011G05490	VIT_201S0026G00190	VIT_201S0026G00220	VIT_201S0026G01400	VIT_201S0026G01630	VIT_201S0026G01890	VIT_201S0026G02080	VIT_201S0113G00560	VIT_201S0127G00470
	DOWN	VIT_200S0160G00010	VIT_200S0160G00090	VIT_200S0160G00110	VIT_200S0160G00310	VIT_200S0160G00320	VIT_200S0160G00360	VIT_200S0184G00120	VIT_200S0194G00280	VIT_200S0203G00130	VIT_200S0207G00010	VIT_200S0218G00090	VIT_200S0220G00180	VIT_200S0253G00040	VIT_200S0270G00130	VIT_200S0301G00060	VIT_200S0313G00030	VIT_200S0335G00010	VIT_200S0335G00020	VIT_200S0340G00040	VIT_200S0373G00010	VIT_200S0375G00010	VIT_200S0475G00010	VIT_200S0483G00040	VIT_200S0583G00030	VIT_200S0601G00040	VIT_200S0850G00010	VIT_200S1306G00010	VIT_200S1306G00020	VIT_200S1353G00010	VIT_200S2594G00010	VIT_200S2607G00010	VIT_201S0010G00950	VIT_201S0010G00980	VIT_201S0010G01000	VIT_201S0010G01200	VIT_201S0010G01390	VIT_201S0010G01660	VIT_201S0010G01830	VIT_201S0010G01850	VIT_201S0010G02210	VIT_201S0010G03710	VIT_201S0011G00370	VIT_201S0011G00450	VIT_201S0011G00500	VIT_201S0011G00530	VIT_201S0011G02030	VIT_201S0011G02930	VIT_201S0011G04450
T3_H-T3_F	UP	VIT_200S0125G00280	VIT_200S0131G00010	VIT_200S0173G00060	VIT_200S0187G00050	VIT_200S0187G00080	VIT_200S0187G00090	VIT_200S0207G00210	VIT_200S0218G00170	VIT_200S0218G00190	VIT_200S0229G00190	VIT_200S0233G00010	VIT_200S0245G00050	VIT_200S0246G00210	VIT_200S0265G00080	VIT_200S0265G00090	VIT_200S0282G00010	VIT_200S0282G00020	VIT_200S0323G00100	VIT_200S0338G00020	VIT_200S0370G00070	VIT_200S0371G00100	VIT_200S0389G00040	VIT_200S0414G00030	VIT_200S0414G00060	VIT_200S0454G00010	VIT_200S0454G00030	VIT_200S0531G00050	VIT_200S0567G00060	VIT_200S0670G00020	VIT_200S0705G00010	VIT_200S0823G00020	VIT_200S0904G00010	VIT_200S1194G00020	VIT_200S1290G00010	VIT_200S1566G00010	VIT_200S1897G00010	VIT_200S2466G00010	VIT_200S2871G00010	VIT_201S0010G01220	VIT_201S0010G01900	VIT_201S0010G02410	VIT_201S0010G03620	VIT_201S0010G03770	VIT_201S0010G03940	VIT_201S0011G01500	VIT_201S0011G01510	VIT_201S0011G01790	VIT_201S0011G02520
	DOWN	VIT_200S0160G00090	VIT_200S0160G00110	VIT_200S0179G00270	VIT_200S0181G00090	VIT_200S0184G00120	VIT_200S0203G00130	VIT_200S0204G00120	VIT_200S0225G00230	VIT_200S0246G00180	VIT_200S0250G00030	VIT_200S0252G00110	VIT_200S0274G00050	VIT_200S0294G00090	VIT_200S0301G00090	VIT_200S0337G00010	VIT_200S0375G00040	VIT_200S0394G00040	VIT_200S0467G00010	VIT_200S0476G00020	VIT_200S0483G00020	VIT_200S0507G00020	VIT_200S0558G00020	VIT_200S0567G00010	VIT_200S0586G00010	VIT_200S0590G00020	VIT_200S0647G00010	VIT_200S0652G00030	VIT_200S0804G00010	VIT_200S1188G00010	VIT_200S2668G00010	VIT_201S0010G00530	VIT_201S0010G00980	VIT_201S0010G00990	VIT_201S0010G02150	VIT_201S0010G03320	VIT_201S0011G00530	VIT_201S0011G00720	VIT_201S0011G03470	VIT_201S0011G03740	VIT_201S0011G04140	VIT_201S0011G04450	VIT_201S0011G05880	VIT_201S0011G06600	VIT_201S0026G00710	VIT_201S0026G00850	VIT_201S0026G01250	VIT_201S0127G00010	VIT_201S0127G00070
T3_H-T3_FH	UP	VIT_200S0207G00230	VIT_200S0216G00070	VIT_200S0225G00060	VIT_200S0253G00060	VIT_200S0276G00060	VIT_200S0304G00030	VIT_200S0324G00010	VIT_200S0335G00020	VIT_200S0347G00110	VIT_200S0353G00050	VIT_200S0414G00030	VIT_200S0414G00060	VIT_200S0710G00020	VIT_200S0742G00030	VIT_200S0800G00010	VIT_200S0804G00020	VIT_200S0945G00010	VIT_200S1290G00010	VIT_200S1306G00010	VIT_200S1312G00010	VIT_200S1365G00010	VIT_200S1667G00010	VIT_200S2125G00010	VIT_201S0010G01390	VIT_201S0011G00620	VIT_201S0011G01630	VIT_201S0011G02030	VIT_201S0011G04910	VIT_201S0011G05180	VIT_201S0011G05500	VIT_201S0011G06550	VIT_201S0026G00960	VIT_201S0026G01490	VIT_201S0026G02190	VIT_201S0026G02620	VIT_201S0113G00420	VIT_201S0127G00360	VIT_201S0137G00240	VIT_201S0137G00580	VIT_201S0137G00630	VIT_201S0137G00650	VIT_201S0150G00250	VIT_201S0150G00460	VIT_202S0012G00460	VIT_202S0012G01450	VIT_202S0025G01330	VIT_202S0025G02410	VIT_202S0025G03480
	DOWN	VIT_200S0225G00230	VIT_200S0270G00120	VIT_200S0301G00100	VIT_200S0304G00060	VIT_200S0317G00140	VIT_200S0323G00050	VIT_200S0333G00040	VIT_200S0337G00010	VIT_200S0347G00080	VIT_200S0394G00040	VIT_200S0483G00020	VIT_200S0586G00010	VIT_200S0665G00040	VIT_200S1323G00010	VIT_200S1405G00010	VIT_200S2507G00010	VIT_201S0011G00760	VIT_201S0011G04360	VIT_201S0011G04670	VIT_201S0026G00680	VIT_201S0026G01630	VIT_201S0026G01890	VIT_201S0113G00560	VIT_201S0127G00470	VIT_201S0146G00440	VIT_202S0012G00030	VIT_202S0012G00450	VIT_202S0012G01010	VIT_202S0012G01500	VIT_202S0025G00830	VIT_202S0025G01140	VIT_202S0025G01230	VIT_202S0025G01290	VIT_202S0025G01350	VIT_202S0025G02200	VIT_202S0025G02800	VIT_202S0033G00700	VIT_202S0033G01390	VIT_202S0033G01400	VIT_202S0241G00100	VIT_203S0038G02430	VIT_203S0038G02610	VIT_203S0038G02950	VIT_203S0038G03690	VIT_203S0038G03720	VIT_203S0063G00450	VIT_203S0063G00540	VIT_203S0063G01380
T4_C-T4_F	UP	VIT_204S0023G01390	VIT_204S0023G02480	VIT_211S0016G03950
	DOWN	VIT_200S0386G00050	VIT_200S0804G00020	VIT_200S0945G00010	VIT_204S0023G00230	VIT_207S0151G01060	VIT_208S0007G08460	VIT_208S0056G00330	VIT_210S0003G02890	VIT_210S0071G00420	VIT_210S0071G00560	VIT_210S0116G01760	VIT_215S0046G01480	VIT_217S0000G03930	VIT_217S0000G06350	VIT_218S0001G10640	VIT_218S0041G02390	VIT_218S0117G00030	VIT_219S0015G01560
T4_C-T4_FH	UP	VIT_200S0160G00110	VIT_200S0160G00120	VIT_200S0160G00310	VIT_200S0160G00320	VIT_200S0184G00140	VIT_200S0184G00190	VIT_200S0216G00020	VIT_200S0264G00060	VIT_200S0269G00020	VIT_200S0270G00050	VIT_200S0304G00070	VIT_200S0323G00100	VIT_200S0335G00010	VIT_200S0335G00020	VIT_200S0341G00060	VIT_200S0415G00060	VIT_200S0483G00020	VIT_200S0567G00010	VIT_200S0590G00010	VIT_200S0625G00040	VIT_200S0742G00040	VIT_200S0800G00020	VIT_200S1232G00020	VIT_200S1273G00010	VIT_200S1290G00010	VIT_200S1927G00010	VIT_200S2171G00010	VIT_200S2430G00010	VIT_201S0010G01450	VIT_201S0010G01850	VIT_201S0010G03350	VIT_201S0010G03630	VIT_201S0011G00690	VIT_201S0011G00720	VIT_201S0011G00940	VIT_201S0011G01300	VIT_201S0011G01480	VIT_201S0011G01820	VIT_201S0011G01930	VIT_201S0011G02980	VIT_201S0011G03380	VIT_201S0011G05250	VIT_201S0011G05260	VIT_201S0011G05600	VIT_201S0011G05790	VIT_201S0011G06000	VIT_201S0011G06400	VIT_201S0026G00990
	DOWN	VIT_200S0125G00090	VIT_200S0125G00280	VIT_200S0179G00300	VIT_200S0181G00010	VIT_200S0181G00260	VIT_200S0187G00080	VIT_200S0187G00300	VIT_200S0189G00050	VIT_200S0194G00010	VIT_200S0194G00020	VIT_200S0199G00260	VIT_200S0199G00300	VIT_200S0207G00210	VIT_200S0211G00050	VIT_200S0218G00050	VIT_200S0218G00160	VIT_200S0218G00190	VIT_200S0225G00060	VIT_200S0225G00150	VIT_200S0227G00140	VIT_200S0227G00170	VIT_200S0229G00190	VIT_200S0233G00020	VIT_200S0252G00020	VIT_200S0260G00060	VIT_200S0265G00090	VIT_200S0271G00110	VIT_200S0283G00030	VIT_200S0286G00020	VIT_200S0288G00060	VIT_200S0291G00050	VIT_200S0291G00100	VIT_200S0301G00170	VIT_200S0322G00020	VIT_200S0323G00070	VIT_200S0324G00070	VIT_200S0338G00020	VIT_200S0341G00030	VIT_200S0353G00060	VIT_200S0379G00070	VIT_200S0386G00040	VIT_200S0386G00050	VIT_200S0389G00020	VIT_200S0437G00010	VIT_200S0454G00010	VIT_200S0454G00030	VIT_200S0484G00030	VIT_200S0531G00050
T4_C-T4_H	UP	VIT_200S0160G00090	VIT_200S0160G00120	VIT_200S0160G00150	VIT_200S0184G00120	VIT_200S0184G00190	VIT_200S0264G00020	VIT_200S0265G00060	VIT_200S0323G00100	VIT_200S0335G00010	VIT_200S0533G00010	VIT_200S1290G00010	VIT_201S0010G00530	VIT_201S0010G00980	VIT_201S0010G00990	VIT_201S0010G01450	VIT_201S0011G00530	VIT_201S0011G01530	VIT_201S0011G02200	VIT_201S0011G03740	VIT_201S0011G04870	VIT_201S0011G05790	VIT_201S0026G00200	VIT_201S0026G01090	VIT_201S0026G01960	VIT_201S0137G00670	VIT_201S0137G00690	VIT_201S0137G00790	VIT_201S0150G00140	VIT_202S0025G01090	VIT_202S0025G01320	VIT_202S0025G03660	VIT_202S0025G04120	VIT_202S0025G04990	VIT_202S0025G05050	VIT_202S0033G01210	VIT_203S0038G02440	VIT_203S0038G03530	VIT_203S0038G04390	VIT_203S0091G01040	VIT_203S0097G00560	VIT_203S0097G00570	VIT_204S0008G06310	VIT_204S0008G07340	VIT_204S0023G01390	VIT_204S0023G03570	VIT_205S0020G01080	VIT_205S0077G00540	VIT_205S0077G01280
	DOWN	VIT_200S0184G00050	VIT_200S0194G00020	VIT_200S0194G00200	VIT_200S0229G00100	VIT_200S0261G00020	VIT_200S0322G00010	VIT_200S0324G00070	VIT_200S0370G00060	VIT_200S0698G00010	VIT_200S0804G00020	VIT_200S0945G00010	VIT_200S1644G00010	VIT_200S2507G00010	VIT_201S0010G01760	VIT_201S0010G01890	VIT_201S0011G02960	VIT_201S0011G03080	VIT_201S0011G05050	VIT_201S0011G05150	VIT_201S0011G05190	VIT_201S0011G05850	VIT_201S0011G06320	VIT_201S0026G00330	VIT_201S0026G01140	VIT_201S0026G02070	VIT_201S0146G00120	VIT_201S0244G00140	VIT_202S0012G00460	VIT_202S0012G01440	VIT_202S0012G01880	VIT_202S0025G00510	VIT_202S0025G02840	VIT_202S0025G03380	VIT_202S0025G03500	VIT_202S0154G00100	VIT_203S0038G00230	VIT_203S0063G02590	VIT_203S0167G00220	VIT_204S0008G03610	VIT_204S0008G04050	VIT_204S0023G00230	VIT_204S0023G03240	VIT_204S0044G01260	VIT_205S0020G01840	VIT_205S0020G02080	VIT_205S0020G03970	VIT_205S0020G04060	VIT_205S0049G00550
T4_FH-T4_F	UP	VIT_200S0179G00300	VIT_200S0187G00080	VIT_200S0194G00180	VIT_200S0265G00090	VIT_200S0454G00010	VIT_200S0454G00030	VIT_201S0010G03930	VIT_201S0011G02720	VIT_201S0011G04780	VIT_201S0011G05150	VIT_201S0011G05490	VIT_201S0026G02660	VIT_201S0026G02710	VIT_201S0127G00560	VIT_201S0137G00790	VIT_202S0025G02560	VIT_202S0025G04310	VIT_202S0241G00120	VIT_203S0038G00490	VIT_203S0038G01510	VIT_203S0038G03560	VIT_203S0038G04160	VIT_203S0063G01330	VIT_203S0088G00240	VIT_203S0088G00320	VIT_203S0091G00670	VIT_204S0008G02000	VIT_204S0023G01090	VIT_204S0023G01150	VIT_204S0023G01890	VIT_204S0044G00050	VIT_205S0020G00890	VIT_205S0020G01820	VIT_205S0020G01830	VIT_205S0020G02720	VIT_205S0049G00550	VIT_205S0049G00780	VIT_205S0049G01020	VIT_205S0051G00180	VIT_205S0077G00530	VIT_205S0077G01150	VIT_205S0077G01280	VIT_205S0094G01120	VIT_206S0004G04170	VIT_206S0004G04590	VIT_206S0004G04860	VIT_206S0004G05770	VIT_206S0004G05810
	DOWN	VIT_200S2507G00010	VIT_202S0012G01020	VIT_202S0012G01450	VIT_203S0063G00780	VIT_204S0023G01490	VIT_204S0069G00260	VIT_205S0094G00750	VIT_206S0004G04640	VIT_207S0104G01080	VIT_209S0002G01040	VIT_211S0016G02360	VIT_211S0016G04090	VIT_213S0064G01380	VIT_215S0021G00270	VIT_216S0039G00820	VIT_217S0000G00710	VIT_217S0000G00720	VIT_218S0001G10040	VIT_218S0001G13360
T4_H-T4_F	UP	VIT_202S0025G00550	VIT_202S0154G00090	VIT_205S0049G00550	VIT_206S0009G00980	VIT_207S0197G00060	VIT_208S0007G06450	VIT_212S0059G00490	VIT_213S0064G00460	VIT_213S0067G03820	VIT_214S0006G02590	VIT_216S0050G00930	VIT_216S0050G02680	VIT_216S0098G00770	VIT_218S0001G14810
	DOWN	VIT_200S0313G00070	VIT_201S0011G00030	VIT_201S0011G00530	VIT_201S0011G02200	VIT_202S0025G01090	VIT_204S0008G02840	VIT_205S0077G01280	VIT_207S0031G02630	VIT_210S0071G00300	VIT_210S0071G00560	VIT_215S0021G00270	VIT_217S0000G03890	VIT_217S0000G06700	VIT_218S0001G05060	VIT_218S0001G12710	VIT_219S0014G04900	VIT_219S0014G04930	VIT_219S0090G01530
T4_H-T4_FH	UP	VIT_200S0233G00010	VIT_200S2527G00010	VIT_201S0010G01810	VIT_202S0154G00090	VIT_205S0020G04440	VIT_206S0009G00450	VIT_207S0031G02140	VIT_207S0130G00220	VIT_208S0007G01290	VIT_208S0058G01070	VIT_209S0002G01040	VIT_209S0002G01170	VIT_211S0016G02360	VIT_211S0016G04090	VIT_213S0019G03200	VIT_213S0064G00460	VIT_214S0066G02550	VIT_214S0068G00360	VIT_214S0068G00370	VIT_215S0021G02510	VIT_215S0046G02120	VIT_216S0050G02340	VIT_217S0000G00720	VIT_217S0000G01850	VIT_218S0072G00150	VIT_218S0072G01170	VIT_219S0027G00740	VIT_219S0090G00530
	DOWN	VIT_200S0181G00010	VIT_200S0187G00080	VIT_200S0194G00180	VIT_200S0323G00070	VIT_200S0454G00010	VIT_201S0010G00020	VIT_201S0010G01380	VIT_201S0011G04780	VIT_201S0026G00910	VIT_201S0026G01510	VIT_201S0026G01570	VIT_201S0026G01590	VIT_201S0026G02710	VIT_201S0137G00790	VIT_201S0150G00200	VIT_201S0244G00170	VIT_202S0025G01090	VIT_202S0025G02560	VIT_202S0025G02960	VIT_202S0025G04180	VIT_202S0087G01020	VIT_203S0038G00860	VIT_203S0038G01510	VIT_203S0038G03560	VIT_203S0038G04160	VIT_203S0088G00320	VIT_204S0008G00460	VIT_204S0008G04510	VIT_204S0044G00050	VIT_204S0044G01870	VIT_204S0079G00680	VIT_205S0020G00890	VIT_205S0020G01820	VIT_205S0020G01830	VIT_205S0020G02280	VIT_205S0020G02310	VIT_205S0020G04610	VIT_205S0049G00960	VIT_205S0049G01320	VIT_205S0077G00530	VIT_205S0077G01280	VIT_205S0077G01910	VIT_205S0094G01380	VIT_206S0004G04170	VIT_206S0004G04860	VIT_206S0004G06830	VIT_206S0080G00920	VIT_207S0005G00510
T5_C-T5_F	UP	VIT_202S0025G01090	VIT_205S0077G01280
	DOWN	VIT_208S0007G06760	VIT_208S0007G08460	VIT_213S0019G02680	VIT_215S0046G02000	VIT_218S0001G10640
T5_C-T5_FH	UP	VIT_200S0125G00180	VIT_200S0125G00190	VIT_200S0125G00230	VIT_200S0125G00270	VIT_200S0144G00010	VIT_200S0160G00110	VIT_200S0160G00320	VIT_200S0160G00360	VIT_200S0174G00260	VIT_200S0179G00130	VIT_200S0179G00210	VIT_200S0179G00270	VIT_200S0181G00210	VIT_200S0181G00220	VIT_200S0181G00260	VIT_200S0184G00120	VIT_200S0184G00180	VIT_200S0186G00010	VIT_200S0194G00100	VIT_200S0211G00060	VIT_200S0211G00160	VIT_200S0215G00040	VIT_200S0215G00050	VIT_200S0220G00080	VIT_200S0227G00030	VIT_200S0227G00060	VIT_200S0229G00010	VIT_200S0229G00030	VIT_200S0229G00110	VIT_200S0230G00050	VIT_200S0238G00020	VIT_200S0252G00060	VIT_200S0265G00050	VIT_200S0274G00070	VIT_200S0276G00010	VIT_200S0283G00010	VIT_200S0285G00030	VIT_200S0285G00050	VIT_200S0291G00090	VIT_200S0301G00100	VIT_200S0304G00030	VIT_200S0309G00020	VIT_200S0313G00010	VIT_200S0313G00020	VIT_200S0317G00100	VIT_200S0335G00010	VIT_200S0335G00020	VIT_200S0341G00040
	DOWN	VIT_200S0153G00050	VIT_200S0173G00260	VIT_200S0179G00300	VIT_200S0181G00020	VIT_200S0181G00090	VIT_200S0181G00160	VIT_200S0181G00170	VIT_200S0181G00230	VIT_200S0184G00020	VIT_200S0184G00050	VIT_200S0186G00020	VIT_200S0186G00080	VIT_200S0187G00040	VIT_200S0187G00200	VIT_200S0187G00270	VIT_200S0187G00310	VIT_200S0187G00360	VIT_200S0189G00080	VIT_200S0194G00010	VIT_200S0194G00020	VIT_200S0199G00120	VIT_200S0199G00260	VIT_200S0199G00300	VIT_200S0203G00040	VIT_200S0203G00210	VIT_200S0204G00170	VIT_200S0207G00110	VIT_200S0211G00050	VIT_200S0218G00070	VIT_200S0218G00090	VIT_200S0218G00220	VIT_200S0220G00070	VIT_200S0220G00130	VIT_200S0225G00080	VIT_200S0226G00090	VIT_200S0227G00070	VIT_200S0227G00170	VIT_200S0229G00050	VIT_200S0229G00060	VIT_200S0229G00100	VIT_200S0229G00160	VIT_200S0229G00170	VIT_200S0233G00020	VIT_200S0245G00050	VIT_200S0252G00020	VIT_200S0252G00050	VIT_200S0259G00070	VIT_200S0259G00160
T5_C-T5_H	UP	VIT_200S0125G00190	VIT_200S0125G00270	VIT_200S0144G00010	VIT_200S0160G00110	VIT_200S0179G00210	VIT_200S0181G00210	VIT_200S0181G00220	VIT_200S0184G00120	VIT_200S0184G00210	VIT_200S0184G00230	VIT_200S0186G00010	VIT_200S0194G00070	VIT_200S0204G00020	VIT_200S0211G00160	VIT_200S0220G00080	VIT_200S0227G00030	VIT_200S0227G00060	VIT_200S0238G00020	VIT_200S0274G00070	VIT_200S0285G00030	VIT_200S0287G00030	VIT_200S0287G00040	VIT_200S0291G00090	VIT_200S0294G00040	VIT_200S0301G00100	VIT_200S0302G00020	VIT_200S0313G00020	VIT_200S0317G00140	VIT_200S0335G00020	VIT_200S0341G00040	VIT_200S0361G00100	VIT_200S0370G00030	VIT_200S0370G00040	VIT_200S0375G00040	VIT_200S0389G00030	VIT_200S0391G00050	VIT_200S0399G00060	VIT_200S0429G00040	VIT_200S0467G00010	VIT_200S0467G00030	VIT_200S0477G00030	VIT_200S0477G00040	VIT_200S0483G00020	VIT_200S0525G00030	VIT_200S0527G00010	VIT_200S0586G00010	VIT_200S0587G00040	VIT_200S0615G00030
	DOWN	VIT_200S0174G00330	VIT_200S0184G00050	VIT_200S0186G00090	VIT_200S0187G00360	VIT_200S0189G00080	VIT_200S0194G00020	VIT_200S0194G00330	VIT_200S0194G00340	VIT_200S0199G00260	VIT_200S0199G00300	VIT_200S0203G00040	VIT_200S0204G00170	VIT_200S0211G00040	VIT_200S0211G00050	VIT_200S0216G00070	VIT_200S0218G00050	VIT_200S0218G00080	VIT_200S0218G00090	VIT_200S0218G00220	VIT_200S0220G00070	VIT_200S0220G00180	VIT_200S0225G00060	VIT_200S0225G00090	VIT_200S0226G00090	VIT_200S0227G00070	VIT_200S0227G00140	VIT_200S0227G00200	VIT_200S0229G00100	VIT_200S0229G00190	VIT_200S0233G00020	VIT_200S0245G00050	VIT_200S0253G00040	VIT_200S0253G00080	VIT_200S0259G00070	VIT_200S0259G00100	VIT_200S0259G00160	VIT_200S0259G00190	VIT_200S0259G00200	VIT_200S0260G00060	VIT_200S0264G00050	VIT_200S0271G00110	VIT_200S0274G00080	VIT_200S0274G00090	VIT_200S0282G00040	VIT_200S0304G00010	VIT_200S0313G00040	VIT_200S0322G00010	VIT_200S0324G00020
T5_FH-T5_F	UP	VIT_200S0153G00050	VIT_200S0174G00140	VIT_200S0179G00110	VIT_200S0179G00150	VIT_200S0179G00300	VIT_200S0181G00090	VIT_200S0181G00160	VIT_200S0181G00170	VIT_200S0181G00230	VIT_200S0186G00020	VIT_200S0186G00080	VIT_200S0187G00200	VIT_200S0187G00270	VIT_200S0187G00310	VIT_200S0189G00080	VIT_200S0194G00010	VIT_200S0194G00020	VIT_200S0199G00300	VIT_200S0211G00050	VIT_200S0214G00130	VIT_200S0218G00070	VIT_200S0225G00080	VIT_200S0226G00090	VIT_200S0227G00160	VIT_200S0227G00170	VIT_200S0229G00050	VIT_200S0229G00060	VIT_200S0229G00160	VIT_200S0252G00050	VIT_200S0259G00150	VIT_200S0259G00160	VIT_200S0259G00200	VIT_200S0260G00060	VIT_200S0260G00080	VIT_200S0264G00050	VIT_200S0269G00010	VIT_200S0282G00010	VIT_200S0282G00040	VIT_200S0283G00060	VIT_200S0283G00070	VIT_200S0304G00050	VIT_200S0313G00070	VIT_200S0338G00020	VIT_200S0375G00050	VIT_200S0386G00020	VIT_200S0386G00040	VIT_200S0459G00040	VIT_200S0484G00020
	DOWN	VIT_200S0125G00170	VIT_200S0125G00180	VIT_200S0125G00230	VIT_200S0144G00010	VIT_200S0160G00010	VIT_200S0160G00090	VIT_200S0160G00110	VIT_200S0160G00120	VIT_200S0160G00310	VIT_200S0160G00320	VIT_200S0160G00360	VIT_200S0179G00140	VIT_200S0179G00210	VIT_200S0179G00270	VIT_200S0184G00120	VIT_200S0187G00150	VIT_200S0194G00100	VIT_200S0211G00060	VIT_200S0215G00040	VIT_200S0215G00050	VIT_200S0220G00080	VIT_200S0220G00170	VIT_200S0227G00030	VIT_200S0229G00010	VIT_200S0229G00030	VIT_200S0229G00110	VIT_200S0230G00050	VIT_200S0233G00010	VIT_200S0245G00070	VIT_200S0252G00060	VIT_200S0265G00050	VIT_200S0274G00070	VIT_200S0276G00010	VIT_200S0276G00020	VIT_200S0276G00050	VIT_200S0276G00060	VIT_200S0279G00050	VIT_200S0285G00050	VIT_200S0286G00130	VIT_200S0291G00090	VIT_200S0304G00030	VIT_200S0309G00020	VIT_200S0317G00100	VIT_200S0335G00010	VIT_200S0335G00020	VIT_200S0340G00080	VIT_200S0341G00060	VIT_200S0361G00100
T5_H-T5_F	UP	VIT_200S0187G00270	VIT_200S0194G00020	VIT_200S0199G00300	VIT_200S0203G00040	VIT_200S0211G00050	VIT_200S0218G00090	VIT_200S0218G00220	VIT_200S0225G00060	VIT_200S0229G00140	VIT_200S0229G00190	VIT_200S0245G00050	VIT_200S0259G00200	VIT_200S0260G00060	VIT_200S0264G00050	VIT_200S0282G00040	VIT_200S0313G00040	VIT_200S0322G00010	VIT_200S0324G00020	VIT_200S0353G00060	VIT_200S0375G00050	VIT_200S0415G00080	VIT_200S0454G00030	VIT_200S0480G00070	VIT_200S0533G00050	VIT_200S0616G00020	VIT_200S0734G00030	VIT_200S0742G00030	VIT_200S0802G00020	VIT_200S0804G00020	VIT_200S0873G00010	VIT_200S0941G00020	VIT_200S0945G00010	VIT_200S0983G00010	VIT_200S1194G00020	VIT_200S1522G00010	VIT_200S1644G00010	VIT_200S1667G00010	VIT_200S2038G00010	VIT_200S2125G00010	VIT_200S2249G00010	VIT_200S2569G00010	VIT_200S2871G00010	VIT_201S0010G01390	VIT_201S0010G01460	VIT_201S0010G02030	VIT_201S0010G03050	VIT_201S0011G00370	VIT_201S0011G00620
	DOWN	VIT_200S0125G00190	VIT_200S0144G00010	VIT_200S0160G00110	VIT_200S0179G00210	VIT_200S0184G00120	VIT_200S0204G00020	VIT_200S0220G00080	VIT_200S0227G00030	VIT_200S0229G00110	VIT_200S0265G00050	VIT_200S0291G00090	VIT_200S0301G00100	VIT_200S0313G00020	VIT_200S0335G00010	VIT_200S0335G00020	VIT_200S0361G00100	VIT_200S0361G00110	VIT_200S0370G00030	VIT_200S0370G00040	VIT_200S0459G00010	VIT_200S0467G00010	VIT_200S0477G00040	VIT_200S0483G00020	VIT_200S0527G00010	VIT_200S0586G00010	VIT_200S0640G00020	VIT_200S0804G00010	VIT_200S0805G00010	VIT_200S0862G00010	VIT_200S0862G00020	VIT_200S1390G00010	VIT_200S1711G00020	VIT_200S2393G00010	VIT_201S0010G01680	VIT_201S0010G01830	VIT_201S0010G01850	VIT_201S0010G02380	VIT_201S0011G00420	VIT_201S0011G00700	VIT_201S0011G01040	VIT_201S0011G01300	VIT_201S0011G01480	VIT_201S0011G01730	VIT_201S0011G01760	VIT_201S0011G01940	VIT_201S0011G02050	VIT_201S0011G02120	VIT_201S0011G02160
T5_H-T5_FH	UP	VIT_200S0225G00090	VIT_200S0304G00030	VIT_200S0386G00030	VIT_200S0580G00010	VIT_200S0783G00010	VIT_200S1306G00010	VIT_200S1373G00010	VIT_201S0010G02180	VIT_201S0010G02750	VIT_201S0011G01630	VIT_201S0011G05520	VIT_202S0012G00460	VIT_202S0025G01330	VIT_202S0025G03760	VIT_202S0033G01370	VIT_202S0087G00840	VIT_204S0008G05220	VIT_205S0049G01220	VIT_206S0004G02750	VIT_207S0005G02230	VIT_207S0005G04130	VIT_207S0005G05010	VIT_207S0129G00490	VIT_208S0007G02470	VIT_208S0007G03710	VIT_208S0007G04550	VIT_209S0002G00330	VIT_209S0002G00740	VIT_209S0002G01730	VIT_209S0070G00480	VIT_210S0003G01900	VIT_210S0003G04560	VIT_211S0016G00170	VIT_211S0016G02280	VIT_212S0028G03720	VIT_212S0035G00800	VIT_212S0035G00880	VIT_212S0035G01740	VIT_213S0019G00330	VIT_213S0047G01140	VIT_213S0067G01150	VIT_213S0084G00630	VIT_214S0006G03120	VIT_214S0066G01850	VIT_214S0083G00690	VIT_215S0021G01550	VIT_216S0050G01620	VIT_216S0098G00690
	DOWN	VIT_201S0011G01620	VIT_201S0011G03190	VIT_201S0011G05610	VIT_204S0023G02700	VIT_207S0005G00500	VIT_208S0040G02220	VIT_213S0064G01450	VIT_214S0060G02270	VIT_214S0066G01750	VIT_214S0108G01470	VIT_218S0001G10720	VIT_219S0014G01260
[truncated: 2,427 more columns]
