# Supplementary material for: Grape Berry Responses to Sequential Flooding and Heatwave Events: A Physiological, Transcriptional, and Metabolic Overview
Source: Plants (Basel). 2022 Dec 17;11(24):3574. doi: 10.3390/plants11243574 (PMC9788187; doi:10.3390/plants11243574)
Supplement: Supplementary file 1 [file plants-11-03574-s001.zip › Table S3.xlsx]

## Sheet: Foglio1
	Table S3. GO term enrichment of the genes belonging to SA subnetwork.
	GO-ID	p-value	corr p-value	Description	Genes in test set
	30528	3.1364e-08	3.7323e-06	transcription regulator activity	VIT_216S0013G00970, VIT_218S0001G00160, VIT_216S0013G00950, VIT_218S0001G08610, VIT_216S0013G00990, VIT_218S0001G05890, VIT_216S0013G01050, VIT_205S0020G04780, VIT_219S0014G02240, VIT_216S0013G01090, VIT_216S0013G01070, VIT_211S0016G00660, VIT_203S0091G00210, VIT_212S0028G03550, VIT_216S0100G00380, VIT_202S0025G03450, VIT_215S0046G01140, VIT_203S0063G00460, VIT_213S0067G03140
	3700	4.8138e-07	2.8642e-05	transcription factor activity	VIT_216S0013G00970, VIT_216S0013G00950, VIT_218S0001G08610, VIT_216S0013G00990, VIT_218S0001G05890, VIT_216S0013G01050, VIT_219S0014G02240, VIT_216S0013G01090, VIT_216S0013G01070, VIT_211S0016G00660, VIT_216S0100G00380, VIT_215S0046G01140, VIT_203S0063G00460, VIT_213S0067G03140
	9719	8.1666e-07	3.2394e-05	response to endogenous stimulus	VIT_216S0013G00970, VIT_216S0013G00950, VIT_211S0016G00660, VIT_207S0005G00090, VIT_216S0013G00990, VIT_218S0001G05890, VIT_216S0013G01050, VIT_210S0116G01040, VIT_219S0014G02240, VIT_216S0013G01090, VIT_203S0063G00460, VIT_216S0013G01070
	6350	7.2905e-06	0.00021689	transcription	VIT_216S0013G00970, VIT_218S0001G00160, VIT_204S0023G01660, VIT_216S0013G00950, VIT_218S0001G08610, VIT_216S0050G02530, VIT_216S0013G00990, VIT_218S0001G05890, VIT_214S0219G00050, VIT_216S0013G01050, VIT_205S0020G04780, VIT_219S0014G02240, VIT_216S0013G01090, VIT_216S0013G01070, VIT_207S0031G01460, VIT_219S0027G00840, VIT_211S0016G00660, VIT_203S0091G00210, VIT_212S0028G03550, VIT_216S0100G00380,…
	34645	0.00078523	0.0078002	cellular macromolecule biosynthetic process	VIT_216S0013G00970, VIT_218S0001G00160, VIT_204S0023G01660, VIT_216S0013G00950, VIT_218S0001G08610, VIT_216S0050G02530, VIT_216S0013G00990, VIT_218S0001G05890, VIT_214S0219G00050, VIT_216S0013G01050, VIT_205S0020G04780, VIT_219S0014G02240, VIT_216S0013G01090, VIT_216S0013G01070, VIT_207S0031G01460, VIT_219S0027G00840, VIT_211S0016G00660, VIT_203S0091G00210, VIT_212S0028G03550, VIT_216S0100G00380,…
	9059	0.00078523	0.0078002	macromolecule biosynthetic process	VIT_216S0013G00970, VIT_218S0001G00160, VIT_204S0023G01660, VIT_216S0013G00950, VIT_218S0001G08610, VIT_216S0050G02530, VIT_216S0013G00990, VIT_218S0001G05890, VIT_214S0219G00050, VIT_216S0013G01050, VIT_205S0020G04780, VIT_219S0014G02240, VIT_216S0013G01090, VIT_216S0013G01070, VIT_207S0031G01460, VIT_219S0027G00840, VIT_211S0016G00660, VIT_203S0091G00210, VIT_212S0028G03550, VIT_216S0100G00380,…
	44249	0.00078523	0.0078002	cellular biosynthetic process	VIT_216S0013G00970, VIT_218S0001G00160, VIT_204S0023G01660, VIT_216S0013G00950, VIT_218S0001G08610, VIT_216S0050G02530, VIT_216S0013G00990, VIT_218S0001G05890, VIT_214S0219G00050, VIT_216S0013G01050, VIT_205S0020G04780, VIT_219S0014G02240, VIT_216S0013G01090, VIT_216S0013G01070, VIT_207S0031G01460, VIT_219S0027G00840, VIT_211S0016G00660, VIT_203S0091G00210, VIT_212S0028G03550, VIT_216S0100G00380,…
	10467	0.00078523	0.0078002	gene expression	VIT_216S0013G00970, VIT_218S0001G00160, VIT_204S0023G01660, VIT_216S0013G00950, VIT_218S0001G08610, VIT_216S0050G02530, VIT_216S0013G00990, VIT_218S0001G05890, VIT_214S0219G00050, VIT_216S0013G01050, VIT_205S0020G04780, VIT_219S0014G02240, VIT_216S0013G01090, VIT_216S0013G01070, VIT_207S0031G01460, VIT_219S0027G00840, VIT_211S0016G00660, VIT_203S0091G00210, VIT_212S0028G03550, VIT_216S0100G00380,…
	5618	0.00084058	0.0078002	cell wall	VIT_202S0154G00080, VIT_207S0005G02090, VIT_209S0002G08510, VIT_205S0062G00250, VIT_205S0062G00240, VIT_206S0004G04610, VIT_211S0052G01200
	5634	0.00093584	0.0078002	nucleus	VIT_216S0013G00970, VIT_204S0023G01660, VIT_216S0013G00950, VIT_218S0001G08610, VIT_216S0050G02530, VIT_216S0013G00990, VIT_218S0001G05890, VIT_214S0219G00050, VIT_216S0013G01050, VIT_200S0203G00160, VIT_205S0020G04780, VIT_219S0014G02240, VIT_216S0013G01090, VIT_216S0013G01070, VIT_200S0207G00180, VIT_207S0031G01460, VIT_211S0016G00660, VIT_203S0091G00210, VIT_212S0028G03550, VIT_216S0100G00380,…
	23046	0.00094434	0.0078002	signaling process	VIT_216S0013G00970, VIT_216S0013G00950, VIT_206S0004G06670, VIT_211S0016G00660, VIT_216S0013G00990, VIT_218S0001G05890, VIT_216S0013G01050, VIT_210S0116G01040, VIT_219S0014G02240, VIT_216S0013G01090, VIT_203S0063G00460, VIT_216S0013G01070
	23060	0.00094434	0.0078002	signal transmission	VIT_216S0013G00970, VIT_216S0013G00950, VIT_206S0004G06670, VIT_211S0016G00660, VIT_216S0013G00990, VIT_218S0001G05890, VIT_216S0013G01050, VIT_210S0116G01040, VIT_219S0014G02240, VIT_216S0013G01090, VIT_203S0063G00460, VIT_216S0013G01070
	50794	0.00094434	0.0078002	regulation of cellular process	VIT_216S0013G00970, VIT_216S0013G00950, VIT_206S0004G06670, VIT_211S0016G00660, VIT_216S0013G00990, VIT_218S0001G05890, VIT_216S0013G01050, VIT_210S0116G01040, VIT_219S0014G02240, VIT_216S0013G01090, VIT_203S0063G00460, VIT_216S0013G01070
	7165	0.00094434	0.0078002	signal transduction	VIT_216S0013G00970, VIT_216S0013G00950, VIT_206S0004G06670, VIT_211S0016G00660, VIT_216S0013G00990, VIT_218S0001G05890, VIT_216S0013G01050, VIT_210S0116G01040, VIT_219S0014G02240, VIT_216S0013G01090, VIT_203S0063G00460, VIT_216S0013G01070
	23052	0.00098322	0.0078002	signaling	VIT_216S0013G00970, VIT_216S0013G00950, VIT_206S0004G06670, VIT_211S0016G00660, VIT_216S0013G00990, VIT_218S0001G05890, VIT_216S0013G01050, VIT_210S0116G01040, VIT_219S0014G02240, VIT_216S0013G01090, VIT_203S0063G00460, VIT_216S0013G01070
	50789	0.0013581	0.010101	regulation of biological process	VIT_216S0013G00970, VIT_216S0013G00950, VIT_206S0004G06670, VIT_211S0016G00660, VIT_216S0013G00990, VIT_218S0001G05890, VIT_216S0013G01050, VIT_210S0116G01040, VIT_219S0014G02240, VIT_216S0013G01090, VIT_203S0063G00460, VIT_216S0013G01070
	30312	0.0018311	0.012818	external encapsulating structure	VIT_202S0154G00080, VIT_207S0005G02090, VIT_209S0002G08510, VIT_205S0062G00250, VIT_205S0062G00240, VIT_206S0004G04610, VIT_211S0052G01200
	65007	0.0025717	0.017002	biological regulation	VIT_216S0013G00970, VIT_216S0013G00950, VIT_216S0013G00990, VIT_218S0001G05890, VIT_216S0013G01050, VIT_212S0028G02240, VIT_210S0116G01040, VIT_219S0014G02240, VIT_216S0013G01090, VIT_216S0013G01070, VIT_206S0004G06670, VIT_211S0016G00660, VIT_203S0063G00460
	5615	0.0038418	0.023608	extracellular space	VIT_210S0116G01040, VIT_218S0001G13200
	3677	0.0039677	0.023608	DNA binding	VIT_216S0013G00970, VIT_216S0013G00950, VIT_218S0001G08610, VIT_216S0050G02530, VIT_216S0013G00990, VIT_218S0001G05890, VIT_214S0219G00050, VIT_216S0013G01050, VIT_213S0084G00820, VIT_217S0000G03990, VIT_205S0020G04780, VIT_219S0014G02240, VIT_216S0013G01090, VIT_216S0013G01070, VIT_207S0031G01460, VIT_219S0027G00840, VIT_211S0016G00660, VIT_203S0091G00210, VIT_216S0100G00380, VIT_215S0046G01140,…
	90304	0.0045517	0.025793	nucleic acid metabolic process	VIT_216S0013G00970, VIT_218S0001G00160, VIT_204S0023G01660, VIT_216S0013G00950, VIT_218S0001G08610, VIT_216S0050G02530, VIT_216S0013G00990, VIT_218S0001G05890, VIT_214S0219G00050, VIT_216S0013G01050, VIT_205S0020G04780, VIT_219S0014G02240, VIT_216S0013G01090, VIT_216S0013G01070, VIT_207S0031G01460, VIT_219S0027G00840, VIT_211S0016G00660, VIT_203S0091G00210, VIT_212S0028G03550, VIT_216S0100G00380,…
	5886	0.0052136	0.028201	plasma membrane	VIT_219S0015G00620, VIT_211S0016G04570, VIT_204S0008G01080, VIT_219S0014G03770, VIT_215S0048G01750, VIT_206S0004G06670, VIT_206S0004G06560, VIT_204S0008G01970, VIT_214S0060G01810, VIT_214S0030G01700, VIT_218S0001G15720, VIT_208S0058G00640, VIT_202S0025G01040, VIT_206S0004G04610, VIT_214S0060G01790, VIT_203S0063G02130
	50896	0.0065994	0.034145	response to stimulus	VIT_216S0013G00970, VIT_216S0013G00950, VIT_200S0333G00060, VIT_207S0005G00090, VIT_216S0013G00990, VIT_218S0001G05890, VIT_216S0013G01050, VIT_210S0116G01040, VIT_201S0127G00700, VIT_219S0014G02240, VIT_216S0013G01090, VIT_207S0005G01890, VIT_203S0088G00810, VIT_216S0013G01070, VIT_211S0016G00660, VIT_200S0131G00010, VIT_219S0014G05180, VIT_212S0034G02440, VIT_203S0063G00460
	9835	0.0082525	0.040918	ripening	VIT_207S0005G02090, VIT_202S0025G00360
