# Supplementary material for: Grape Berry Responses to Sequential Flooding and Heatwave Events: A Physiological, Transcriptional, and Metabolic Overview
Source: Plants (Basel). 2022 Dec 17;11(24):3574. doi: 10.3390/plants11243574 (PMC9788187; doi:10.3390/plants11243574)
Supplement: Supplementary file 1 [file plants-11-03574-s001.zip › Table S4.xlsx]

## Sheet: Foglio1
Table S4. Sequences of the primers used for qPCR.
Gene ID	Forward primer	Reverse primer	Type
VIT_213S0019G04720	TGCCTATGTCTTCTCTGGATATGCT	TCTTTGTTTCTGAATGTGGTCCAGG	House-keeping
VIT_217S0000G05580	CATAATATGTACAGCGAGCGTCTCC	TGTCTACTCGCCGACTTCACTAG
VIT_206S0004G03310	AATGCAAGCCGTATCTTACTTCCAG	AGGAGCCATCATCGAATATCTAGCT
VIT_204S0008G07400	AAGTTGAGGAAGCAGAGACAGTAGA	ATGAGAGCCAACAAATCCATTTCCA
VIT_210S0003G00990	GAGAATTACCGCCGAATCTATGTCC	CAGAATTCCCATCCAGCATATCCTG
VIT_201S0127G00470	AACGCTGGGATGTTCGTCTT	ACGAGAGGGATGGGCTTGTA	Target
VIT_217S0000G08010	TGCTGTGAGGGATGGAATGA	ACGAGAGGACCCAGAGGTAA
VIT_207S0141G00290	AGGAAGTGAGGTGGTGAGGAA	AGGTCTGGCTGGATCATTACC
VIT_209S0002G06790	CTTGGCTCGTTTGGCTTTGAG	TTGCCGAGAACCTCTTCACA
VIT_203S0038G01930	TCCACAGAGTGATCCCAAGT	GTTCGCCATCGACAGTATGC
VIT_214S0060G02340	AATCAAAGATGCTGTCGTCACTGTT	TTTATTATCCGAGCCACATTGAGCC
VIT_212S0059G01380	AAGAGAAAGAGAGAGAGATGGAGGC	AGAGATCCCATGATTCACCAACTCA
VIT_215S0048G01320	TGGCTTCTTCCTTGTTGTGAATCAT	TTGCTTCTCAGAGAGTGACATGTTG
VIT_204S0023G02480	GCGAGTCTAGGTCCATAGGTCATAG	CAGCGACTACATTGAGAAAGCAGAA
VIT_206S0004G06830	TAGGAGTGAAGATGGTGATATCCGG	GTGCCTTTATCTTGCGACATGTTTC
VIT_205S0049G00960	ATCTGGGCTTCACAAATCAAGAACT	CCAGTAAGCACATATTTAAGTAGGTCGT
VIT_218S0072G00160	GGCATCAAAGATCAAACCATCAACG	ACCCAACTAAGAGCAGAAGATGAGA
VIT_208S0040G01230	GATGAAGGGTATGTATGGAGAGGCT	GGCTCCTCTGTACTCAAACAAGAAC
